# Supplementary material for: Evidence of an upper entrainment limit for walking with fractal auditory stimuli
Source: PeerJ. 2025 Oct 27;13:e20176. doi: 10.7717/peerj.20176 (PMC12574588; doi:10.7717/peerj.20176)
Supplement: Supplemental Information 1 — Column 1 identifies the participant (with code names removed for full anonymity). Column 2 indicates the participant’s sex, where “1” represents female and “2” represents male. Column 3 specifies the individual’s preferred walking speed on the treadmill. Column 4 designates the trial condition, where “0” represents the baseline, “1” corresponds to the metronome with FSI 1.00, “2” corresponds to FSI 1.05, “3” corresponds to FSI 1.10, “4” corresponds to FSI 1.15, “5” corresponds to FSI 1.20, and “6” corresponds to FSI 1.25. The remaining columns contain the mean values of the variables listed in row 1 for each participant and trial. [file peerj-13-20176-s001.xlsx]

## Sheet: Sheet1
Participant	Sex	PWS	Trial	FSI	Walking Velocity			Notes:	Participant	Sex	PWS	Trial	FSI
1	1	2.5	0	0.8315	1.11387				Names and participant IDs removed for full anonymity	1=female;2=male	average treadmill speed	0=no stimulus; 1=1.00; 2=1.05; 3=1.10; 4=1.15; 5=1.20; 6=1.25	*bold = outlier
1	1	2.5	1	0.8433	1.11926
1	1	2.5	2	0.8861	1.11942
1	1	2.5	3	0.5137	1.11495
1	1	2.5	4	0.9041	1.11961
1	1	2.5	5	0.5632	1.11764
1	1	2.5	6	0.5389	1.11992
2	1	2.1	0	0.9662	0.938029
2	1	2.1	1	1.0904	0.936967
2	1	2.1	2	1.1537	0.939119
2	1	2.1	3	0.7624	0.93457
2	1	2.1	4	0.8222	0.942271
2	1	2.1	5	1.0081	0.936222
2	1	2.1	6	0.631	0.939533
3	2	2.4	0	0.6433	1.07514
3	2	2.4	1	1.1603	1.08007
3	2	2.4	2	1.0912	1.08238
3	2	2.4	3	1.1756	1.07157
3	2	2.4	4	1.1754	1.08215
3	2	2.4	5	0.8061	1.07492
3	2	2.4	6	0.6801	1.07674
4	1	2.3	0	0.6651	1.00441
4	1	2.3	1	0.8247	1.00915
4	1	2.3	2	0.8625	1.00943
4	1	2.3	3	0.5267	1.00816
4	1	2.3	4	1.0322	1.00901
4	1	2.3	5	0.7635	1.00851
4	1	2.3	6	0.6587	1.00651
5	1	2.2	0	0.7685	1.00725
5	1	2.2	1	0.8482	1.00843
5	1	2.2	2	0.979	1.01036
5	1	2.2	3	0.972	1.01281
5	1	2.2	4	0.4472	1.01055
5	1	2.2	5	0.5926	1.01223
5	1	2.2	6	0.5413	1.00672
6	2	2	0	0.8185	0.883316
6	2	2	1	0.8856	0.883241
6	2	2	2	1.0285	0.88416
6	2	2	3	0.8308	0.882041
6	2	2	4	1.047	0.880256
6	2	2	5	0.5163	0.878418
6	2	2	6	0.7305	0.879298
7	2	2.5	0	0.6372	1.12668
7	2	2.5	1	0.9157	1.12456
7	2	2.5	2	0.9865	1.12572
7	2	2.5	3	1.017	1.12644
7	2	2.5	4	0.9408	1.12537
7	2	2.5	5	0.5136	1.12568
7	2	2.5	6	0.5881	1.12581
8	2	1.9	0	0.9031	0.867778
8	2	1.9	1	0.8835	0.860396
8	2	1.9	2	0.9886	0.860783
8	2	1.9	3	1.0321	0.863163
8	2	1.9	4	0.6676	0.862697
8	2	1.9	5	1.161	0.861942
8	2	1.9	6	0.8121	0.864183
9	2	3.2	0	1.3743	1.4053
9	2	3.2	1	0.9728	1.42135
9	2	3.2	2	1.2222	1.42125
9	2	3.2	3	0.6681	1.41267
9	2	3.2	4	1.2381	1.41542
9	2	3.2	5	0.8454	1.43929
9	2	3.2	6	0.8129	1.41459
10	2	2.9	0	0.7668	1.29059
10	2	2.9	1	1.1181	1.2899
10	2	2.9	2	1.0755	1.29364
10	2	2.9	3	1.1069	1.2916
10	2	2.9	4	1.2436	1.29779
10	2	2.9	5	0.8435	1.28756
10	2	2.9	6	0.6196	1.28874
11	1	2.3	0	0.7381	1.02835
11	1	2.3	1	1.1214	1.02697
11	1	2.3	2	0.9378	1.02731
11	1	2.3	3	0.924	1.02638
11	1	2.3	4	1.2063	1.02705
11	1	2.3	5	0.7171	1.0326
11	1	2.3	6	0.528	1.02679
12	2	2.5	0	0.7165	1.12351
12	2	2.5	1	1.0856	1.12523
12	2	2.5	2	1.2147	1.1262
12	2	2.5	3	1.107	1.12564
12	2	2.5	4	1.1914	1.12499
12	2	2.5	5	0.778	1.12458
12	2	2.5	6	0.783	1.124
13	1	1.6	0	0.6969	0.738525
13	1	1.6	1	1.0723	0.741085
13	1	1.6	2	1.0619	0.738584
13	1	1.6	3	0.7437	0.740901
13	1	1.6	4	1.1355	0.738861
13	1	1.6	5	0.7547	0.736398
13	1	1.6	6	0.8526	0.740162
14	1	1.8	0	0.7005	0.824166
14	1	1.8	1	0.9607	0.822676
14	1	1.8	2	0.9223	0.822471
14	1	1.8	3	1.1097	0.820753
14	1	1.8	4	1.0032	0.820824
14	1	1.8	5	0.5994	0.822295
14	1	1.8	6	0.7359	0.822484
